# Supplementary material for: Simultaneous determination of lead and tin at the bismuth film electrode by square wave stripping voltammetry and chemometric methods
Source: Royal Society of Chemistry journal article supplement (doi:10.1039/c6ay00955g), 2016-01-01
Supplement: c6ay00955g1.pdf [file c6ay00955g1.pdf]

## Supplementary Information

# **Simultaneous determination of lead and tin at the bismuth film electrode by square wave stripping voltammetry and chemometrics**

**Wenxian Tang<sup>a</sup>, Jun Bin<sup>b</sup>, Wei Fan<sup>b</sup>, Zhiming Zhang<sup>a</sup>, Yonghuan Yun<sup>a</sup>, Yizeng Liang<sup>a\*</sup>**

(a Research Center of Modernization of Traditional Chinese Herb Medicine, College of Chemistry and Chemical Engineering, Central South University, Changsha, 410083, P. R. China)

(b College of Bioscience and Biotechnology, Hunan Agricultural University, Changsha, 410128, P. R. China)

\* To whom correspondence should be addressed. E-mail: [yizeng\\_liang@263.net](mailto:yizeng_liang@263.net)

This supporting information includes Table S1.

**Table S1** The effect of some foreign metal ions on the stripping performance of Pb(II) and Sn(IV) at the concentrations of 50 µg/L. Other conditions as in Figure 3.

| Added ions | Molar excess | Relative signals <sup>a</sup> |                 |
|------------|--------------|-------------------------------|-----------------|
|            |              | For Pb( II )                  | For Sn(IV)      |
| Na( I )    | 100          | 1.00                          | 1.15            |
| Ca( II )   | 100          | 1.02                          | 0.80            |
| Mg( II )   | 100          | 0.82                          | 0.95            |
| Zn( II )   | 100          | 0.93                          | 0.88            |
| Cd( II )   | 10           | 0.33                          | 0.84            |
|            | 1            | 0.64                          | 0.98            |
| Cu( II )   | 10           | 0.17                          | nd <sup>b</sup> |
|            | 1            | 0.54                          | nd <sup>b</sup> |

<sup>a</sup> Relative signals for Pb( II ) and Sn(IV) in the presence and absence of the interferents.

<sup>b</sup> The word “nd” stands for “not detected”.
